# Supplementary material
Source: publisher figshare collection journal article supplement (https://brill.figshare.com/articles/dataset/_/23309669)
Supplement: Supplementary file 1 [file 1]

# **Modeling the Effect of Psycho-Socio-Economic Consequences of COVID-19 on Life Satisfaction: The Role of Deviation from a Balanced Time Perspective**

**Denisa Fedáková<sup>1</sup>, Matúš Adamkovič<sup>1,2</sup>, Alexander Loziak<sup>1</sup> and Pavol Kačmár<sup>3,\*</sup>**

<sup>1</sup>Institute of Social Sciences of the Centre of Social and Psychological Sciences, Slovak Academy of Sciences,

040 01 Košice, Slovakia

<sup>2</sup>Faculty of Humanities and Social Sciences, University of Jyväskylä, 40014 Jyväskylä, Finland

<sup>3</sup>Department of Psychology, Faculty of Arts, Pavol Jozef Šafárik University in Košice, 040 01 Košice, Slovakia

\*Corresponding author; e-mail: pavol.kacmar@upjs.sk

ORCID iDs: Fedáková: 0000-0001-6816-1802; Adamkovič: 0000-0002-9648-9108; Loziak: 0000-0003-2407-0970; Kačmár: 0000-0003-0076-1945

**Supplementary material**

**Table S1.** Measures description.

| Construct                                           | Reference                                                                               | Number of items and an example                                                                                                                                                                                                         | Response scale                               |
|-----------------------------------------------------|-----------------------------------------------------------------------------------------|----------------------------------------------------------------------------------------------------------------------------------------------------------------------------------------------------------------------------------------|----------------------------------------------|
| Difficulty to adherence to anti-pandemic measures   | Created by authors                                                                      | 11 items: stay home; social distancing; face covering in interior; face covering in exterior; hand washing; public transportation; group activities; collective sports; hand disinfection; hand shaking; travelling abroad for leisure | 1 = not difficult at all; 5 = very difficult |
| Loneliness                                          | Short version of loneliness scale (USL-8; Hays & DiMatteo, 1987)                        | 8 items (e.g., "I feel isolated from others.")                                                                                                                                                                                         | 1 = strongly disagree; 7 = strongly agree    |
| Contentment with pandemic management by authorities | Created by authors                                                                      | 7 items: opinion on how the authorities managed the pandemic situation (e.g., perceived adequacy of restrictions; satisfaction with the pandemic management)                                                                           | 1 = not at all; 7 = very well                |
| Change in economic situation due to the pandemic    | Created by authors                                                                      | 6 items: the impact of the pandemic on the individual and household economic situation (e.g., during the pandemic, your household economic situation...)                                                                               | 1 = worsened; 7 = improved                   |
| COVID-related stress                                | COVID-related stress scale (adapted from the COVIDiSTRESS survey; Yamada et al., 2021). | 18 items: e.g., concerns about the socio-economic situation, daily functioning...                                                                                                                                                      | 1 = no concerns; 7 = big concerns            |
| COVID-related anxiety                               | COVID Anxiety Scale (Silva et al., 2020).                                               | 7 items: e.g., fear of getting infected                                                                                                                                                                                                | 1 = not at all; 7 = completely               |
| Time perspective                                    | ZTPI short (Košťál et al., 2016)                                                        | 18 items: e.g., "It gives me pleasure to think about my past"                                                                                                                                                                          | 1 = very untrue; 5 = very true               |

|                        |                                                         |                          |                                                                 |
|------------------------|---------------------------------------------------------|--------------------------|-----------------------------------------------------------------|
| Satisfaction with life | Cantril's visual (ladder) scale<br>(Kohút et al., 2022) | 1 item - visual (ladder) | 1 = lowest life satisfaction;<br>10 = highest life satisfaction |
|------------------------|---------------------------------------------------------|--------------------------|-----------------------------------------------------------------|

**Table S2.** Regression estimates.

| Estimate                               | b            | SE          | p                | Beta         |
|----------------------------------------|--------------|-------------|------------------|--------------|
| Loneliness                             |              |             |                  |              |
| ~ Adherence                            | 0.19         | 0.04        | <0.001           | 0.19         |
|                                        | <i>0.21</i>  | <i>0.04</i> | <i>&lt;0.001</i> | <i>0.21</i>  |
| Contentment with pandemic management   |              |             |                  |              |
| ~ Adherence                            | -0.21        | 0.04        | <0.001           | -0.21        |
|                                        | <i>-0.15</i> | <i>0.04</i> | <i>&lt;0.001</i> | <i>-0.15</i> |
| Economic change                        |              |             |                  |              |
| ~ Adherence                            | -0.20        | 0.05        | <0.001           | -0.19        |
|                                        | <i>-0.22</i> | <i>0.05</i> | <i>&lt;0.001</i> | <i>-0.22</i> |
| COVID-19-related stress                |              |             |                  |              |
| ~ Loneliness                           | 0.44         | 0.05        | <0.001           | 0.36         |
|                                        | <i>0.53</i>  | <i>0.05</i> | <i>&lt;0.001</i> | <i>0.42</i>  |
| ~ Contentment with pandemic management | 0.13         | 0.04        | 0.002            | 0.11         |
|                                        | <i>0.05</i>  | <i>0.04</i> | <i>0.261</i>     | <i>0.04</i>  |
| ~ Economic change                      | -0.45        | 0.05        | <0.001           | -0.37        |
|                                        | <i>-0.57</i> | <i>0.06</i> | <i>&lt;0.001</i> | <i>-0.45</i> |
| ~ DBTP                                 | 0.32         | 0.05        | <0.001           | 0.22         |
|                                        | <i>0.20</i>  | <i>0.06</i> | <i>0.001</i>     | <i>0.13</i>  |
| COVID-19-related anxiety               |              |             |                  |              |
| ~ Loneliness                           | 0.36         | 0.05        | <0.001           | 0.32         |
|                                        | <i>0.40</i>  | <i>0.05</i> | <i>&lt;0.001</i> | <i>0.35</i>  |
| ~ Contentment with pandemic management | 0.31         | 0.04        | <0.001           | 0.27         |
|                                        | <i>0.23</i>  | <i>0.05</i> | <i>&lt;0.001</i> | <i>.20</i>   |
| ~ Economic change                      | -0.22        | 0.05        | <0.001           | -0.19        |
|                                        | <i>-0.31</i> | <i>0.05</i> | <i>&lt;0.001</i> | <i>-0.27</i> |
| ~ DBTP                                 | 0.28         | 0.05        | <0.001           | 0.21         |
|                                        | <i>0.33</i>  | <i>0.05</i> | <i>&lt;0.001</i> | <i>0.23</i>  |
| Satisfaction with life                 |              |             |                  |              |
| ~ Loneliness                           | -0.32        | 0.04        | <0.001           | -0.31        |
|                                        | <i>-0.37</i> | <i>0.04</i> | <i>&lt;0.001</i> | <i>0.42</i>  |
| ~ Economic change                      | 0.28         | 0.04        | <0.001           | 0.27         |
|                                        | <i>0.43</i>  | <i>0.05</i> | <i>&lt;0.001</i> | <i>0.42</i>  |
| ~ COVID-19-related stress              | 0.06         | 0.04        | 00.076           | 0.71         |
|                                        | <i>-0.03</i> | <i>0.05</i> | <i>.039</i>      | <i>-0.04</i> |
| ~ COVID-19-related anxiety             | 0.02         | 0.04        | 0.020            | 0.02         |
|                                        | <i>0.09</i>  | <i>0.05</i> | <i>0.109</i>     | <i>0.10</i>  |
| ~ DBTP                                 | -0.46        | 0.05        | <0.001           | -0.36        |
|                                        | <i>-0.47</i> | <i>0.05</i> | <i>&lt;0.001</i> | <i>-0.37</i> |

Results from the exploratory datasets are written in regular, results from the confirmatory dataset are written in italic.

## Invariance testing

To test for measurement invariance, configural, weak factorial (metric), strong factorial (scalar), and strict (residual) invariance have been examined.

Results are presented in Supplementary Tables S3 and S4. Note that as some authors argue that the significance of the change in  $\chi^2$  criterion is overly sensitive (see Putnick & Bornstein, 2016 or Svetina & Rutkowski, 2019 for discussion), we provide more detailed results by reporting classical  $\chi^2$  test as well as an alternative fit indices (CFI, RMSEA, and SRMR) across models. In particular, we used  $\Delta CFI \leq -.010$  change in CFI and  $\Delta RMSEA \geq 0.015$  as the criterion.

**Table S3.** Invariance testing – Gender.

| Model                                   | $\chi^2$ ( <i>df</i> ) | CFI       | RMSEA<br>(90%<br>CI) | Model<br>compariso<br>n | $\Delta\chi^2$<br>( $\Delta df$ ) | Decision<br>Based on<br>$\Delta\chi^2$ | $\Delta CF$<br>I | $\Delta RMSE$<br>A | Decision based on<br>$\Delta CFI$ & $\Delta RMSEA$ |
|-----------------------------------------|------------------------|-----------|----------------------|-------------------------|-----------------------------------|----------------------------------------|------------------|--------------------|----------------------------------------------------|
| M1:<br>Configura<br>l<br>Invarianc<br>e | 5865.8 (2718)          | 0.85<br>8 | 0.060                |                         |                                   |                                        |                  |                    |                                                    |
| M2:<br>Metric<br>Invarianc<br>e         | 5932.8 (2764)          | 0.85<br>7 | 0.059                |                         | 67.003<br>(46)*                   | Reject                                 | 0.00<br>1        | 0                  | Accept ( $\Delta CFI$ ;<br>$\Delta RMSEA$ )        |
| M3:<br>Scalar<br>Invarianc<br>e         | 6012.7 (2811)          | 0.85<br>6 | 0.059                |                         | 79.927<br>(47) **                 | Reject                                 | 0.00<br>1        | 0                  | Accept ( $\Delta CFI$ ;<br>$\Delta RMSEA$ )        |
| M4:<br>Residual<br>Invarianc<br>e       | 6024.4 (2817)          | 0.85<br>5 | 0.059                |                         | 11.660<br>(6)***                  | Reject                                 | 0.00<br>0        | 0                  | Accept ( $\Delta CFI$ ;<br>$\Delta RMSEA$ )        |

**Table 3.** Invariance testing – Age groups.

| Model                                   | $\chi^2$ ( <i>df</i> ) | CFI       | RMSEA<br>(90%<br>CI) | Model<br>compariso<br>n | $\Delta\chi^2$<br>( $\Delta df$ ) | Decision<br>Based on<br>$\Delta\chi^2$ | $\Delta CF$<br>I | $\Delta RMSE$<br>A | Decision based on<br>$\Delta CFI$ & $\Delta RMSEA$ |
|-----------------------------------------|------------------------|-----------|----------------------|-------------------------|-----------------------------------|----------------------------------------|------------------|--------------------|----------------------------------------------------|
| M1:<br>Configura<br>l<br>Invarianc<br>e | 9875.8 (5436)          | 0.81<br>5 | 0.071                |                         |                                   |                                        |                  |                    |                                                    |
| M2:<br>Metric<br>Invarianc<br>e         | 10037.8 (5574)         | 0.81<br>4 | 0.070                |                         | 162.01<br>(138)                   | Accept                                 | 0.00<br>1        | 0.001              | Accept ( $\Delta CFI$ ;<br>$\Delta RMSEA$ )        |
| M3:<br>Scalar<br>Invarianc<br>e         | 10361.5 (5715)         | 0.80<br>6 | 0.071                |                         | 323.67<br>(141)***                | Reject                                 | 0.00<br>8        | 0.001              | Accept ( $\Delta CFI$ ;<br>$\Delta RMSEA$ )        |
| M4:<br>Residual<br>Invarianc<br>e       | 10390.9 (5733)         | 0.80<br>6 | 0.071                |                         | 29.40<br>(18)*                    | Reject                                 | 0.00<br>0        | 0.000              | Accept ( $\Delta CFI$ ;<br>$\Delta RMSEA$ )        |

**Relationships across groups**

To further examine the pattern of relations among age and gender, we conducted Multi-group SEM. Regression paths are shown in Supplementary Table 5 and fit indices are listed in Supplementary Table 6.

**Table S5.** Relationships among latent variables across age and gender.

| Variables                     | Age group | Adulthood<br>(30 to 44<br>years) | Middle age<br>(45 years to<br>59 years) | Elder people<br>(60 years and<br>more) | Consistent<br>across age<br>groups? | Gender   |          | Consistent<br>across<br>gender? |
|-------------------------------|-----------|----------------------------------|-----------------------------------------|----------------------------------------|-------------------------------------|----------|----------|---------------------------------|
|                               |           |                                  |                                         |                                        |                                     | Male     | Female   |                                 |
| Loneliness ~                  |           |                                  |                                         |                                        |                                     |          |          |                                 |
| Adherence                     | 0.06      | 0.19**                           | 0.23***                                 | 0.16                                   | No                                  | 0.22***  | 0.21**   | Yes                             |
| Economic change ~             |           |                                  |                                         |                                        |                                     |          |          |                                 |
| Adherence                     | -0.16     | -0.17*                           | -0.18*                                  | -0.32**                                | No                                  | -0.08    | -0.32*** | No                              |
| Economic change ~             |           |                                  |                                         |                                        |                                     |          |          |                                 |
| Adherence                     | -0.14     | -0.26**                          | -0.16                                   | -0.30*                                 | No                                  | -0.20**  | -0.27**  | No                              |
| Covid stress ~                |           |                                  |                                         |                                        |                                     |          |          |                                 |
| Loneliness                    | 0.58***   | 0.30**                           | 0.37***                                 | 0.44***                                | Yes                                 | 0.41***  | 0.37***  | Yes                             |
| Satisfaction with authorities | 0.31*     | 0.14                             | -0.05                                   | 0.19                                   | No                                  | 0.10     | 0.09     | No                              |
| Economic change               | -0.18     | -0.43***                         | -0.49***                                | -0.58***                               | No                                  | -0.48*** | -0.38*** | Yes                             |
| DBTP                          | 0.24***   | 0.25***                          | 0.21***                                 | 0.22***                                | Yes                                 | 0.23**   | 0.22***  | Yes                             |
| Covid anxiety ~               |           |                                  |                                         |                                        |                                     |          |          |                                 |
| Loneliness                    | 0.63***   | 0.25**                           | 0.40***                                 | 0.28**                                 | Yes                                 | 0.38***  | 0.35***  | Yes                             |
| Satisfaction with authorities | 0.28*     | 0.20*                            | 0.20*                                   | 0.34**                                 | Yes                                 | 0.22**   | 0.25***  | Yes                             |
| Economic change               | -0.15     | -0.35***                         | -0.30***                                | -0.11                                  | No                                  | -0.24**  | -0.24**  | Yes                             |
| DBTP                          | 0.21***   | 0.20***                          | 0.19***                                 | 0.20***                                | Yes                                 | 0.22***  | 0.18***  | Yes                             |
| Life satisfaction ~           |           |                                  |                                         |                                        |                                     |          |          |                                 |
| Economic change               | 0.44**    | 0.08                             | 0.10                                    | 0.04                                   | No                                  | 0.13     | 0.25**   | No                              |
| Covid stress                  | -0.19***  | -0.22**                          | -0.20***                                | -0.19***                               | Yes                                 | -0.26*   | -0.15*   | Yes                             |
| Covid anxiety                 | 0.02      | 0.017                            | 0.02                                    | 0.02                                   | Yes                                 | -0.03    | -0.04    | No                              |
| DBTP                          | -0.16***  | -0.16***                         | -0.14***                                | -0.15***                               | Yes                                 | -0.14**  | -0.127** | Yes                             |



**Table 6.** MG-SEM Fit indices.

| Model with | Fit indices                                                                                                       |
|------------|-------------------------------------------------------------------------------------------------------------------|
| Age        | $\chi^2 (5730) = 6563.50, p < 0.001; CFI = 0.89; TLI = 0.89; RMSEA = 0.03, 95\% CI [0.026, 0.033]; SRMR = 0.089)$ |
| Gender     | $\chi^2 (2816) = 3822.50, p < 0.001; CFI = 0.89; TLI = 0.89; RMSEA = 0.03, 95\% CI [0.030, 0.036]; SRMR = 0.072)$ |
